# Supplementary material
Source: Springer Nature journal article supplement (https://www.springermedizin.de/resource/supplementary/13075_2012_4385_MOESM5_ESM.pdf/10110298)
Supplement: MOESM5 [file 10110298]

## Identification of progressors by C1M

Table 1: Baseline characteristics of the Biomarker Study population.

| N                        | 585  |      |
|--------------------------|------|------|
| % Women                  | 83%  |      |
|                          | Mean | SD   |
| Age (years)              | 52.2 | 12.3 |
| BMI (kg/m <sup>2</sup> ) | 27.4 | 6.1  |
| Disease duration (years) | 9.4  | 8.1  |
| Disease parameters       |      |      |
| HAQ                      | 1.51 | 0.62 |
| VAS pain                 | 54.4 | 22.1 |
| TJC (n)                  | 28   | 16   |
| SJC (n)                  | 16   | 9    |
| DAS28-ESR                | 6.5  | 0.93 |
| JSN                      | 11.6 | 14.4 |
| mTSS                     | 28.4 | 29.6 |
| ERN                      | 16.6 | 16.3 |
| Serum biomarkers         |      |      |
| CRP (mg/L)               | 2.13 | 2.57 |
| C1M (nmol/L)             | 109  | 72.0 |

BMI: Body mass index. HAQ: Health assessment questionnaire. VAS pain: Visual analog scale of pain. TJC: Tender joint count. SJC: Swollen joint count. DAS28-ESR: Disease activity score 28-ESR. JSN: joint space narrowing. mTSS: modified total Sharp score. ERN: Erosion score.
